# Supplementary material for: Alkaline stability of pendant C2-protected poly(imidazolium)s
Source: Royal Society of Chemistry journal article supplement (doi:10.1039/d4py00235k), 2024-01-01
Supplement: d4py00235k1.pdf [file d4py00235k1.pdf]

## Supporting Information

### Alkaline Stability of Pendant C2-Protected Poly(imidazolium)s

Kate Fraser,<sup>a=</sup> Anastasiia Konovalova,<sup>a=</sup> Thomas Skalski,<sup>a</sup> Simon Cassegrain,<sup>a</sup> Steven Holdcroft<sup>a\*</sup>  
<sup>a</sup> Department of Chemistry, Simon Fraser University, 8888 University Drive, V5A 1S6 Burnaby, British Columbia, Canada  
<sup>\*</sup>holdcroft@sfu.ca

<sup>=</sup> Authors contributed equally

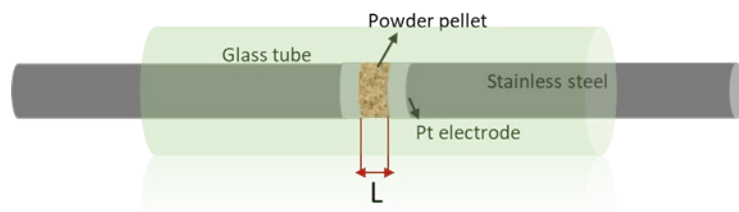

Figure S1: Polymer powder ion conductivity measurement setup.

# NMR Data

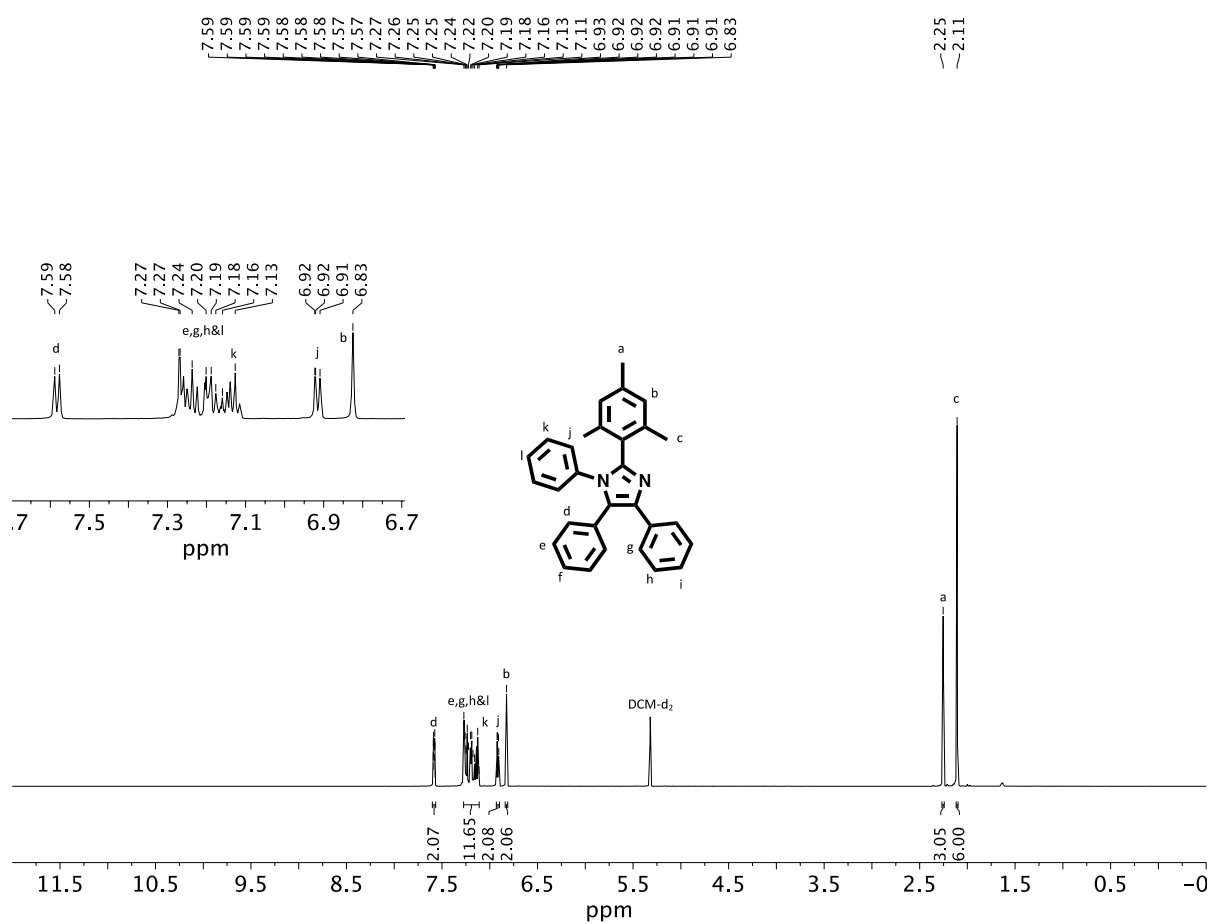

Figure S2: <sup>1</sup>H NMR of compound 5a.

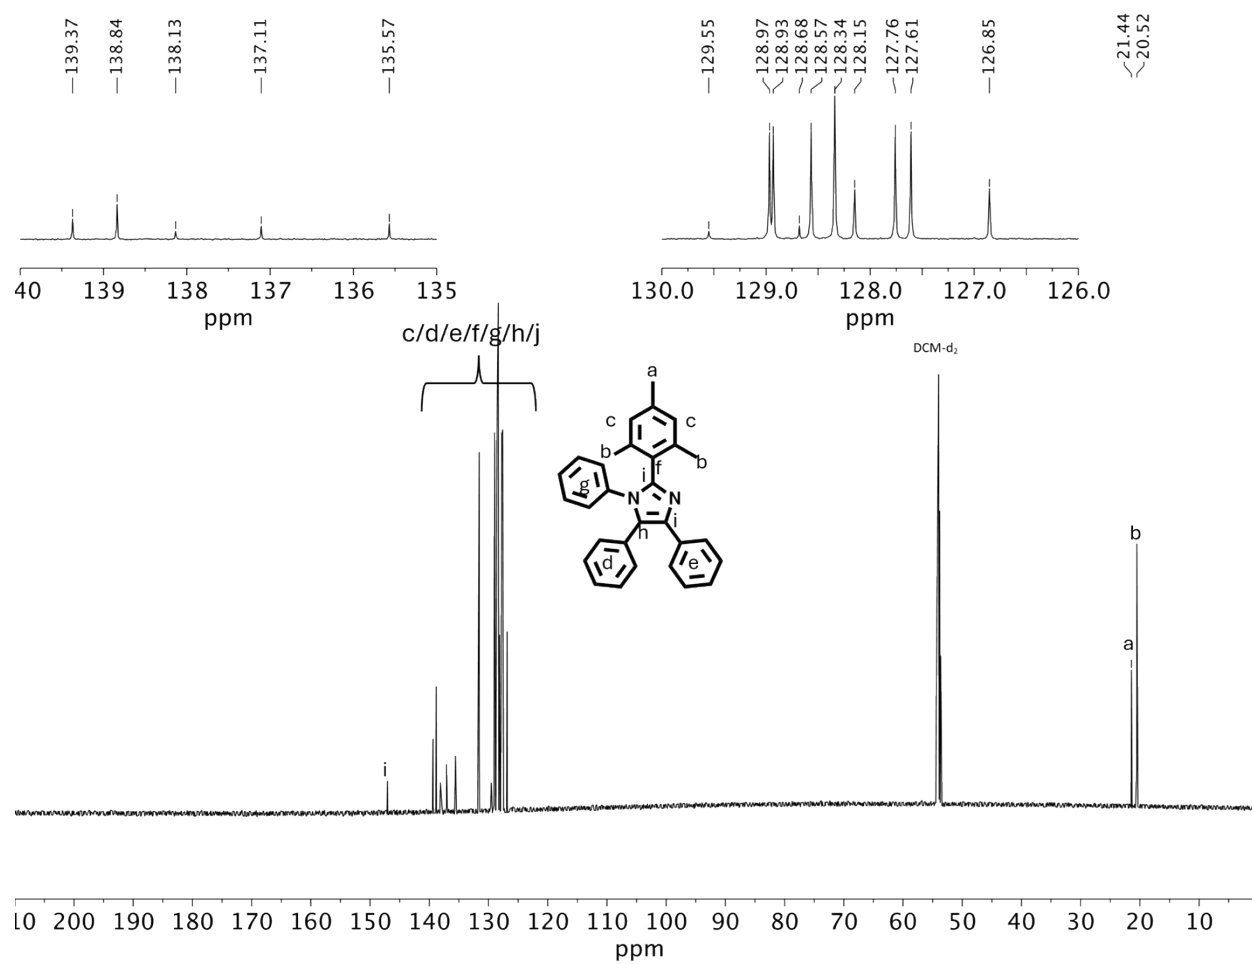

Figure S3: <sup>13</sup>C NMR of compound 5a.

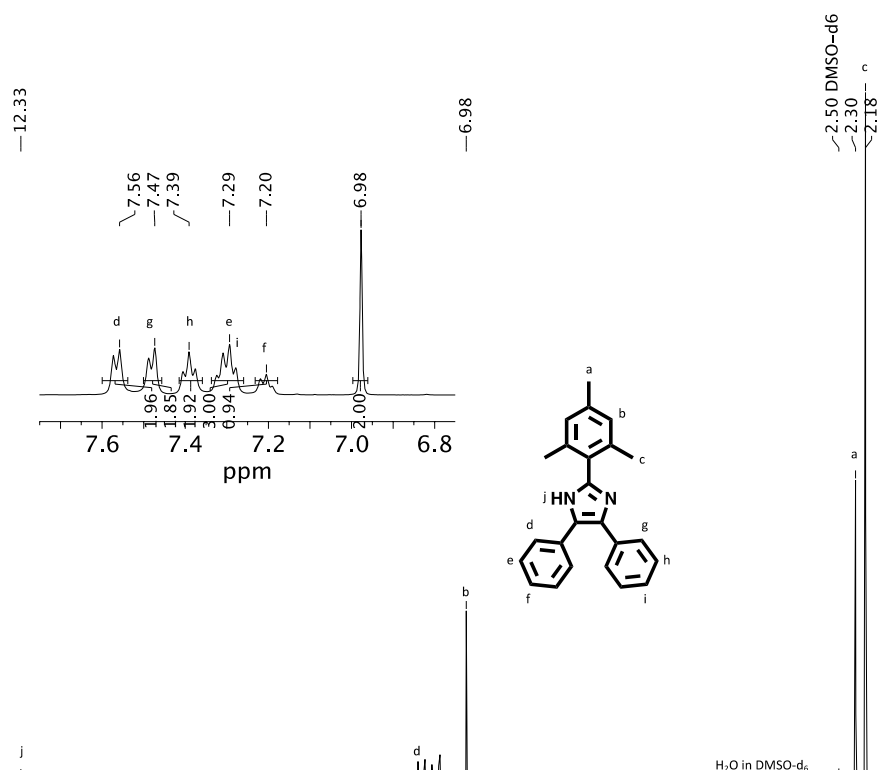

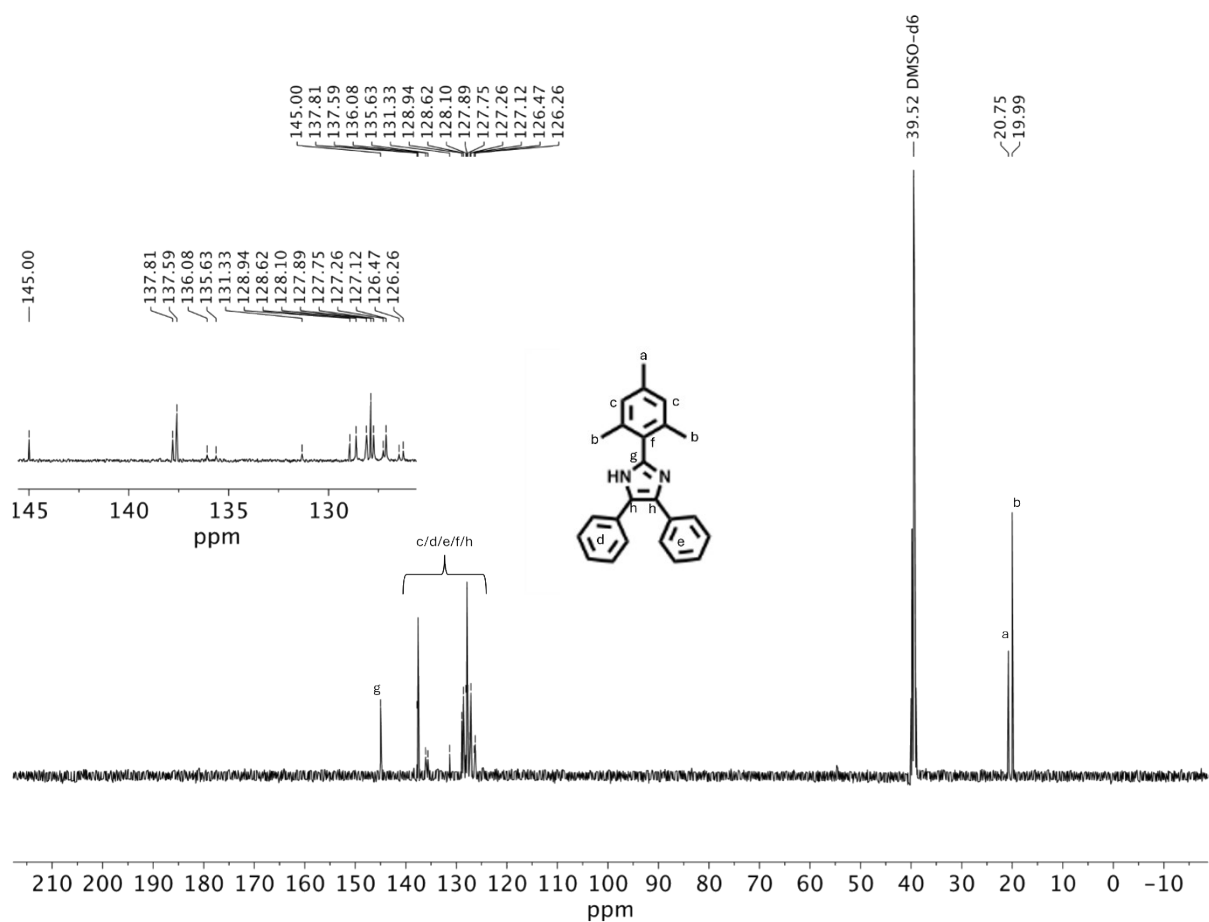

Figure S5: <sup>13</sup>C NMR of compound 5b.

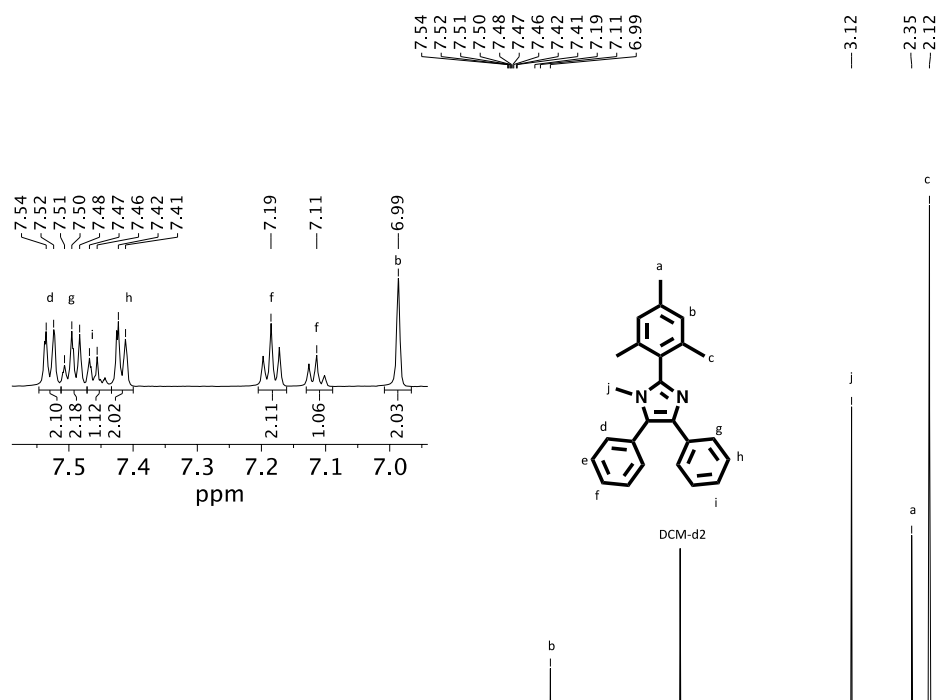

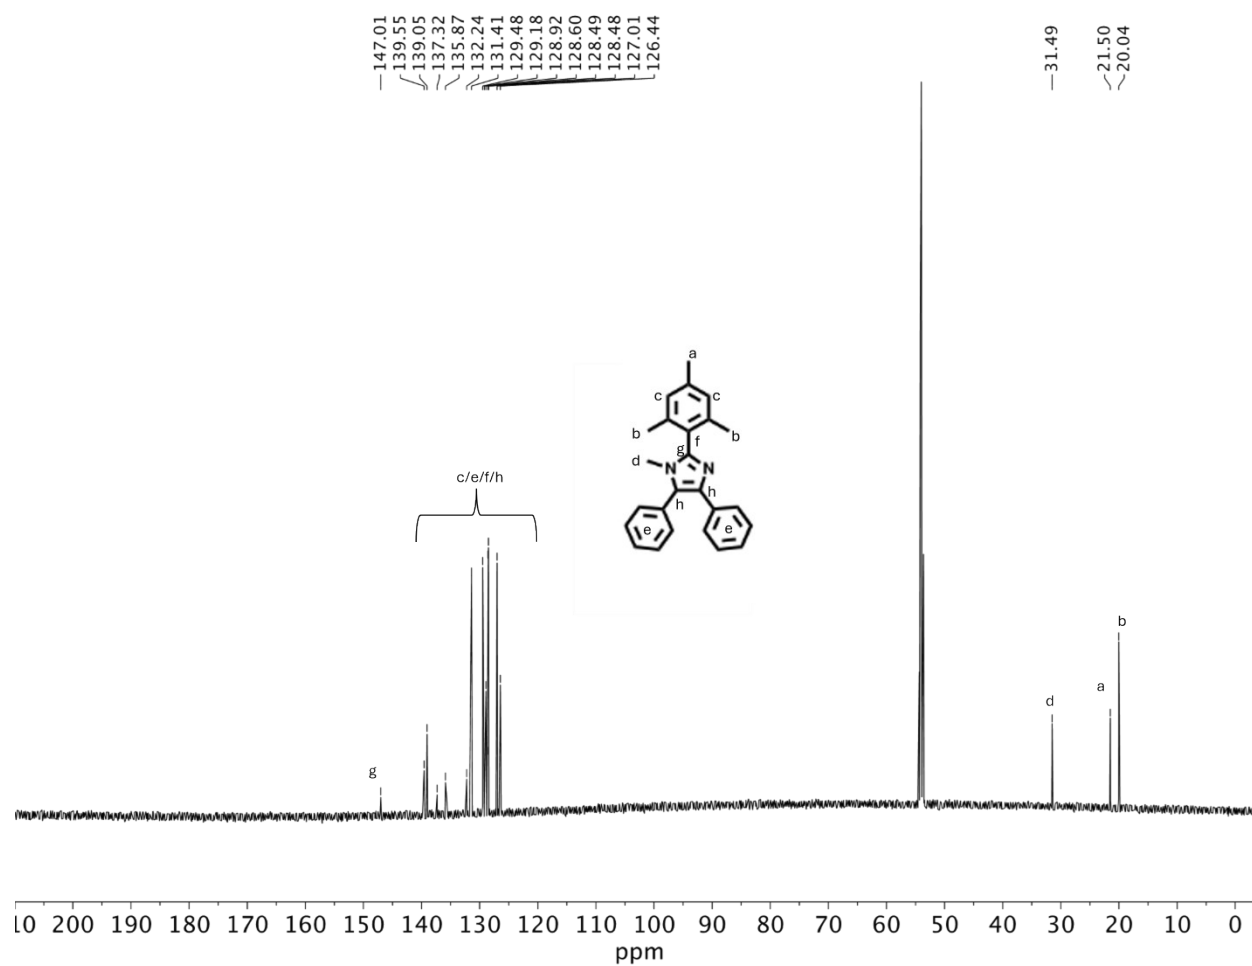

Figure S7: <sup>13</sup>C NMR of compound 6b

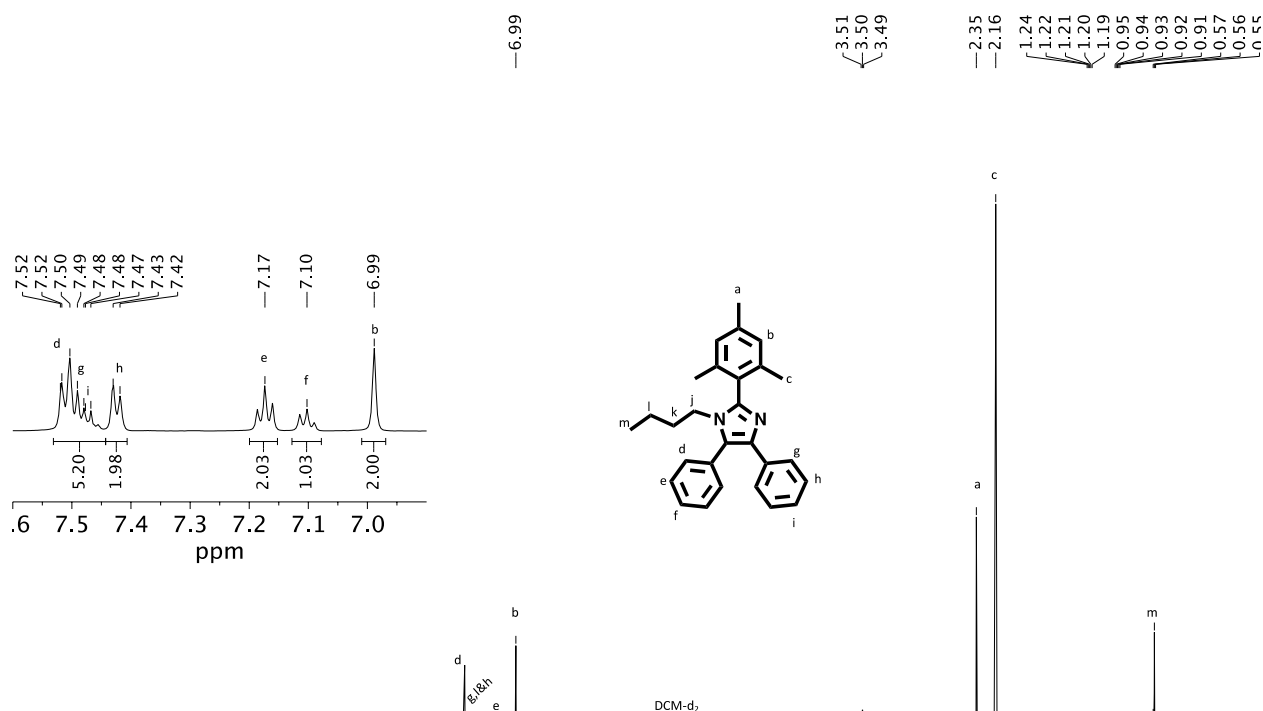

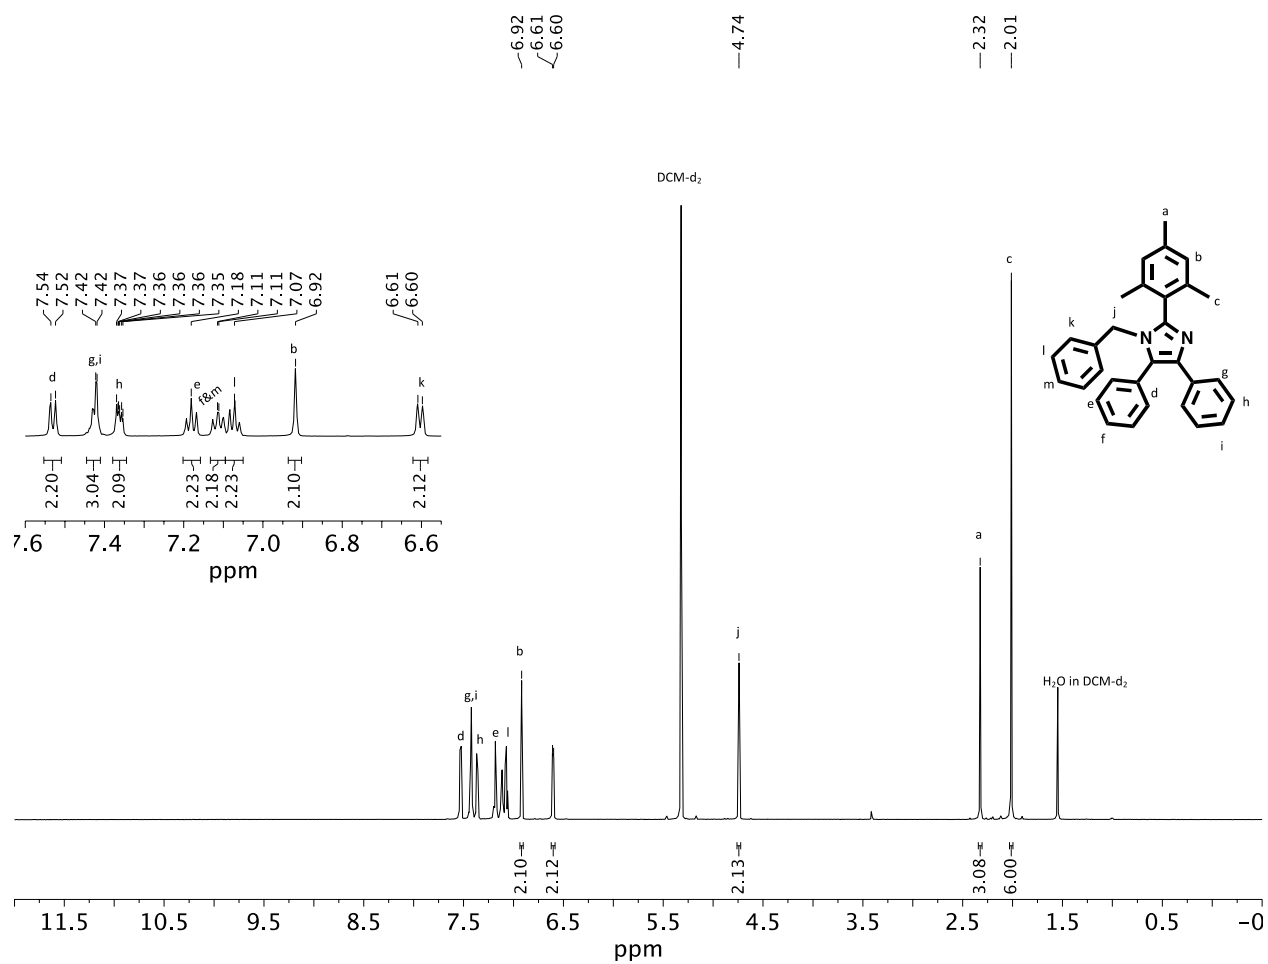

Figure S9: <sup>1</sup>H NMR of compound 6d.

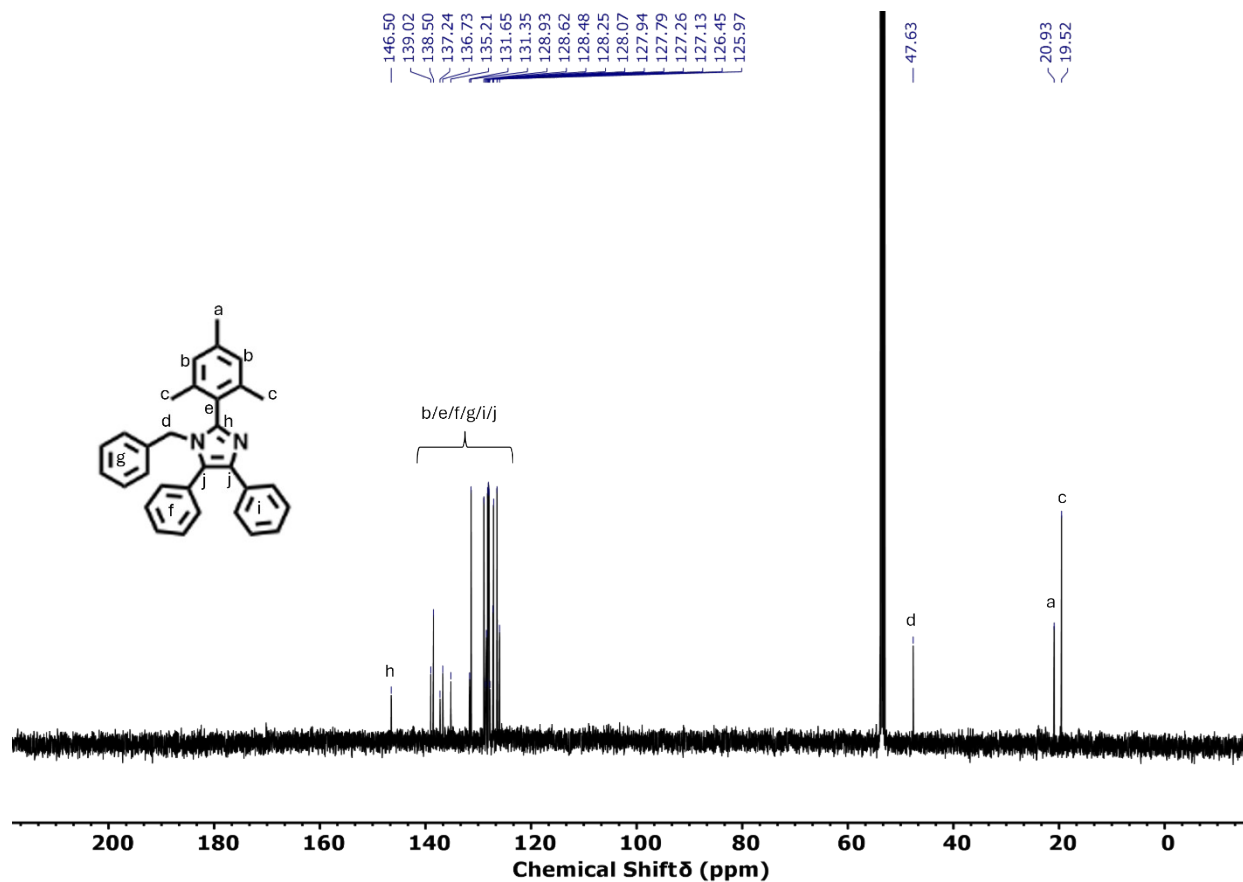

Figure S10: <sup>13</sup>C NMR of compound 6d.

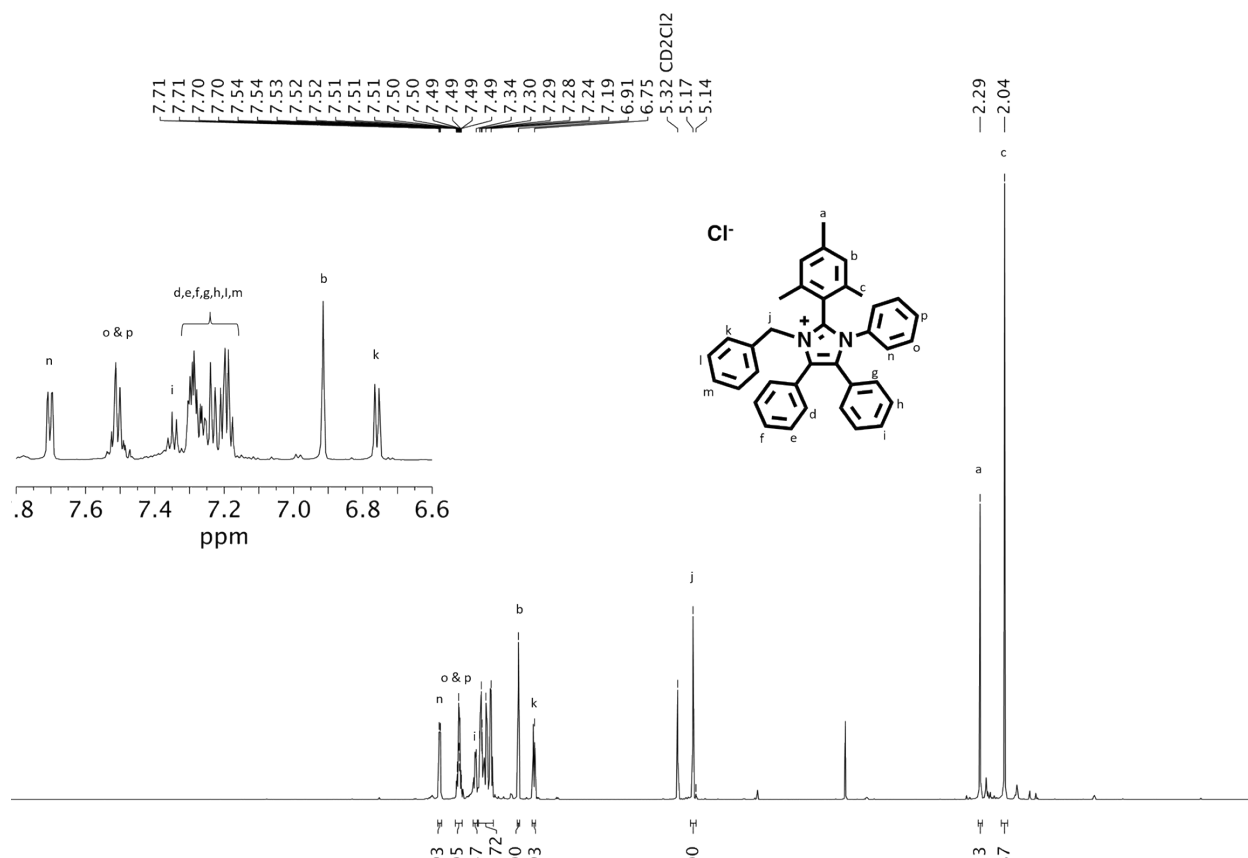

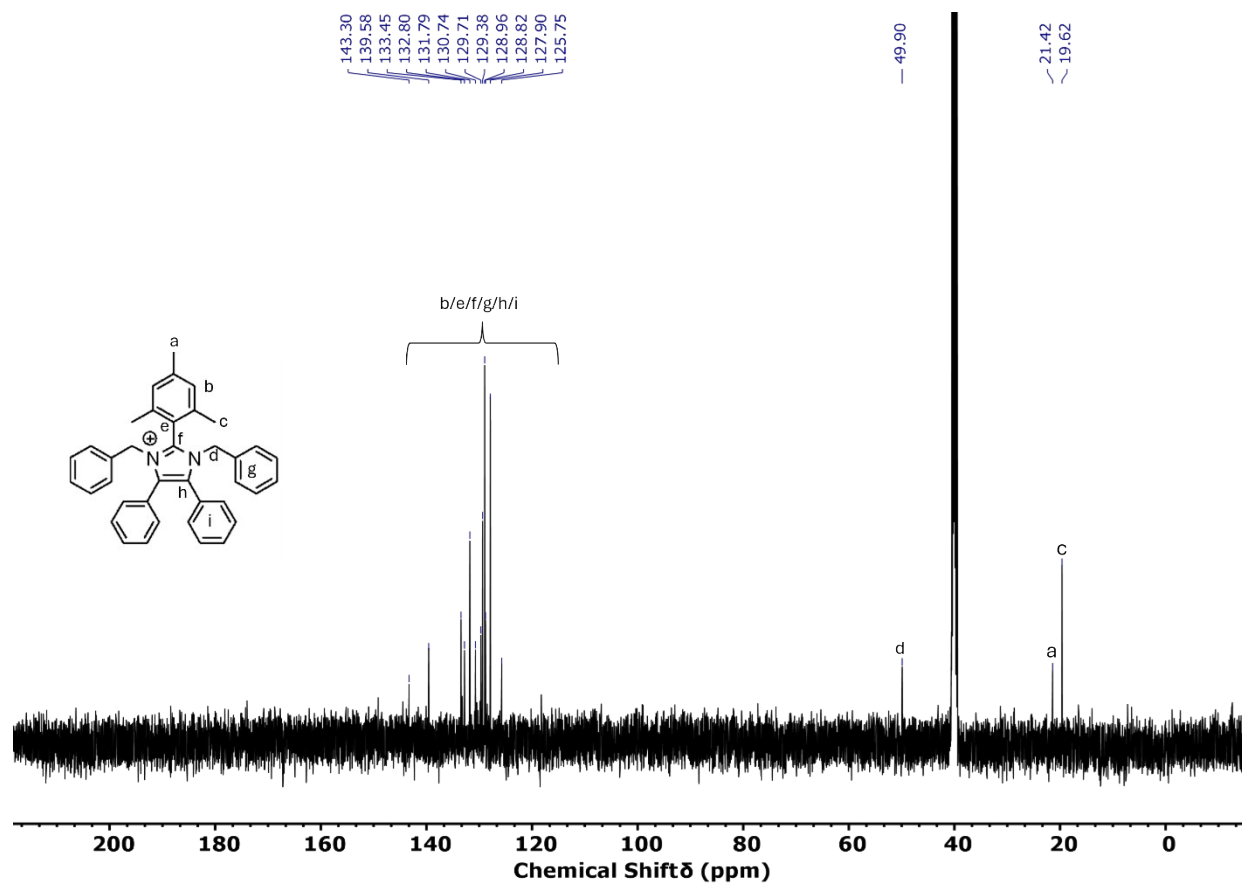

Figure S12:  $^{13}\text{C}$  NMR of compound 7a.

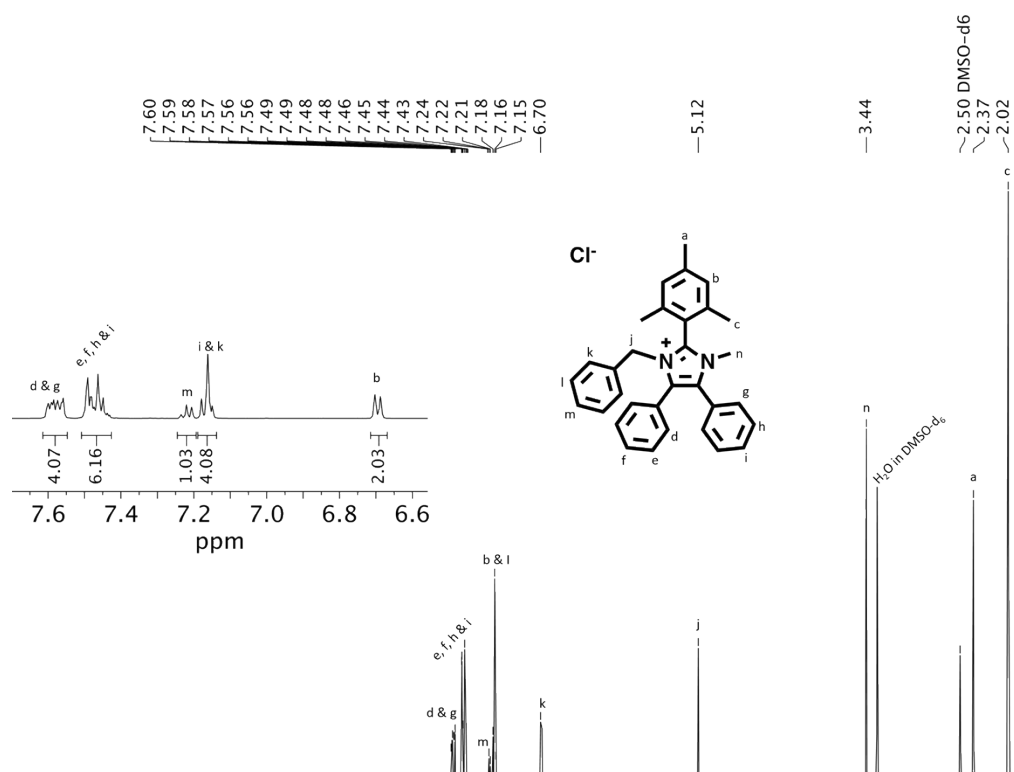



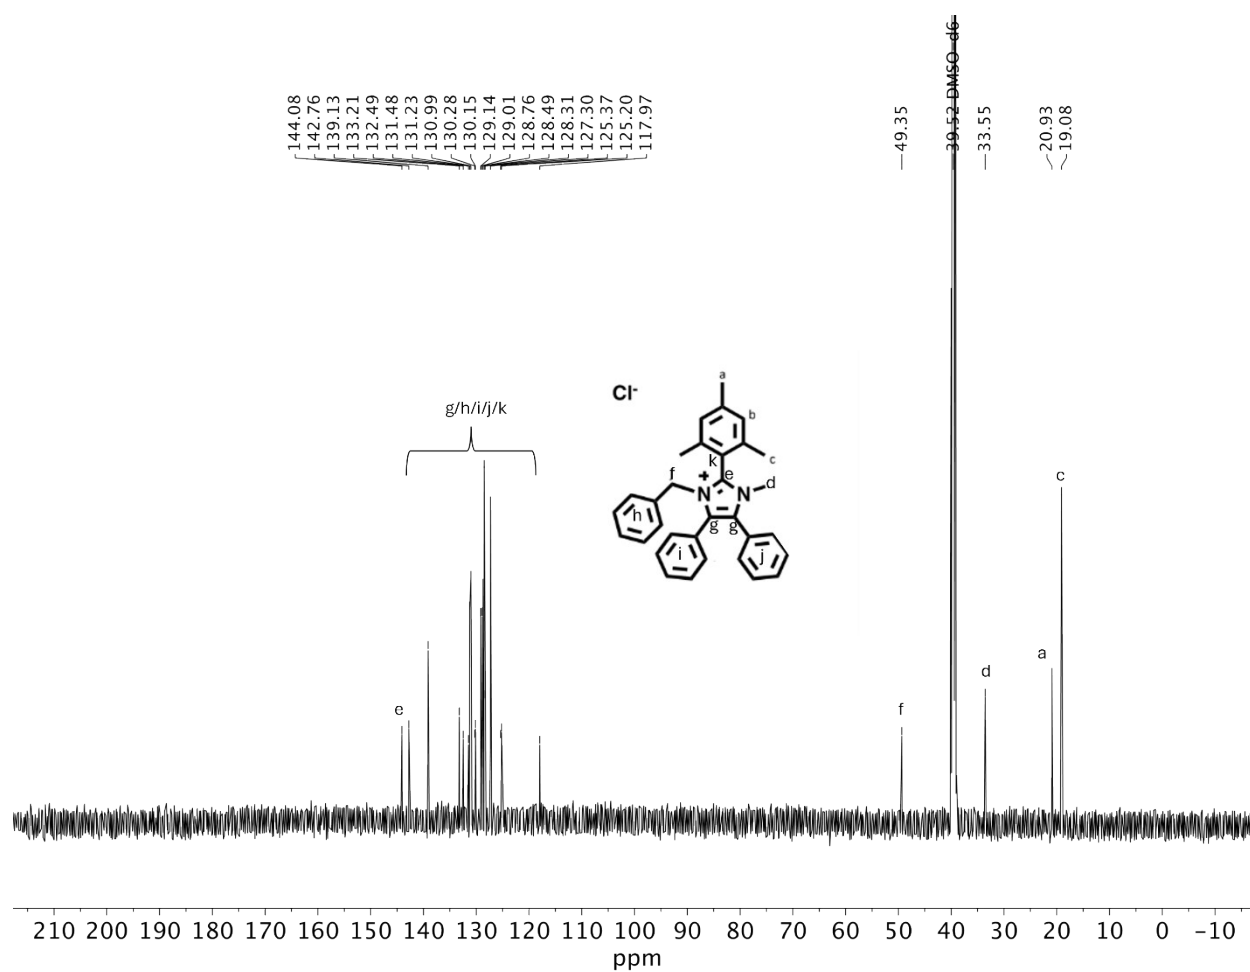

Figure S14: <sup>13</sup>C NMR of compound 7b.

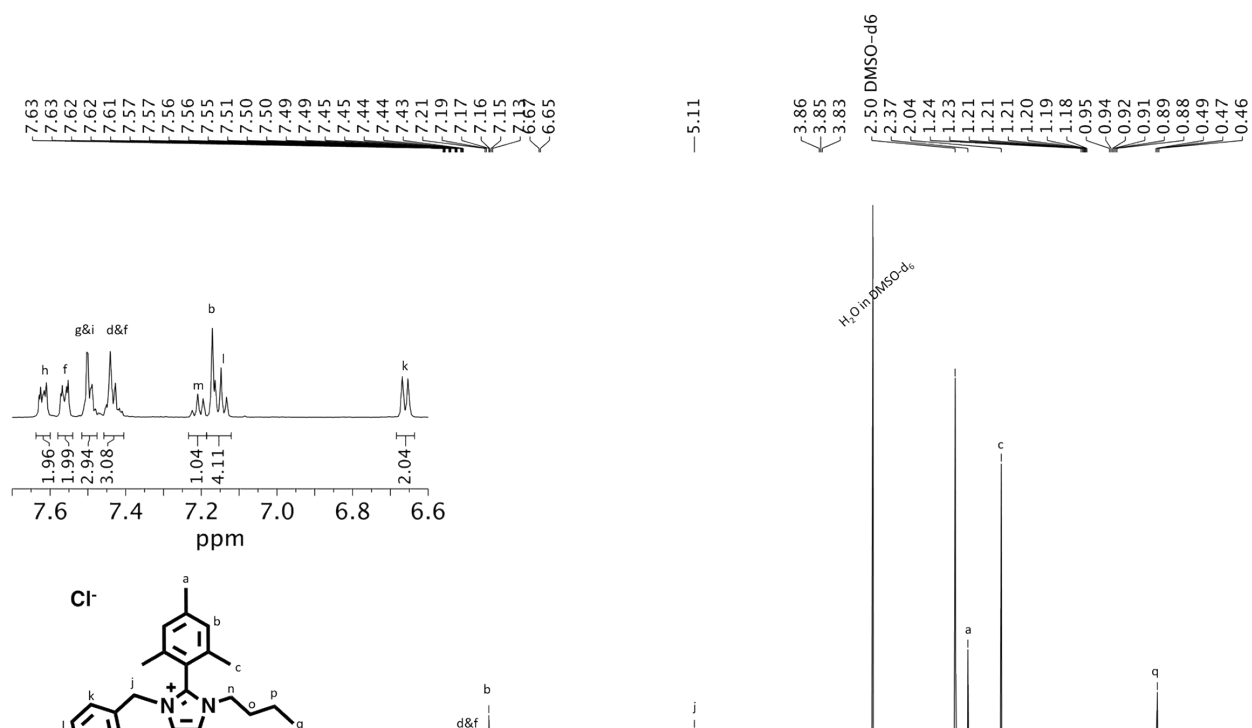

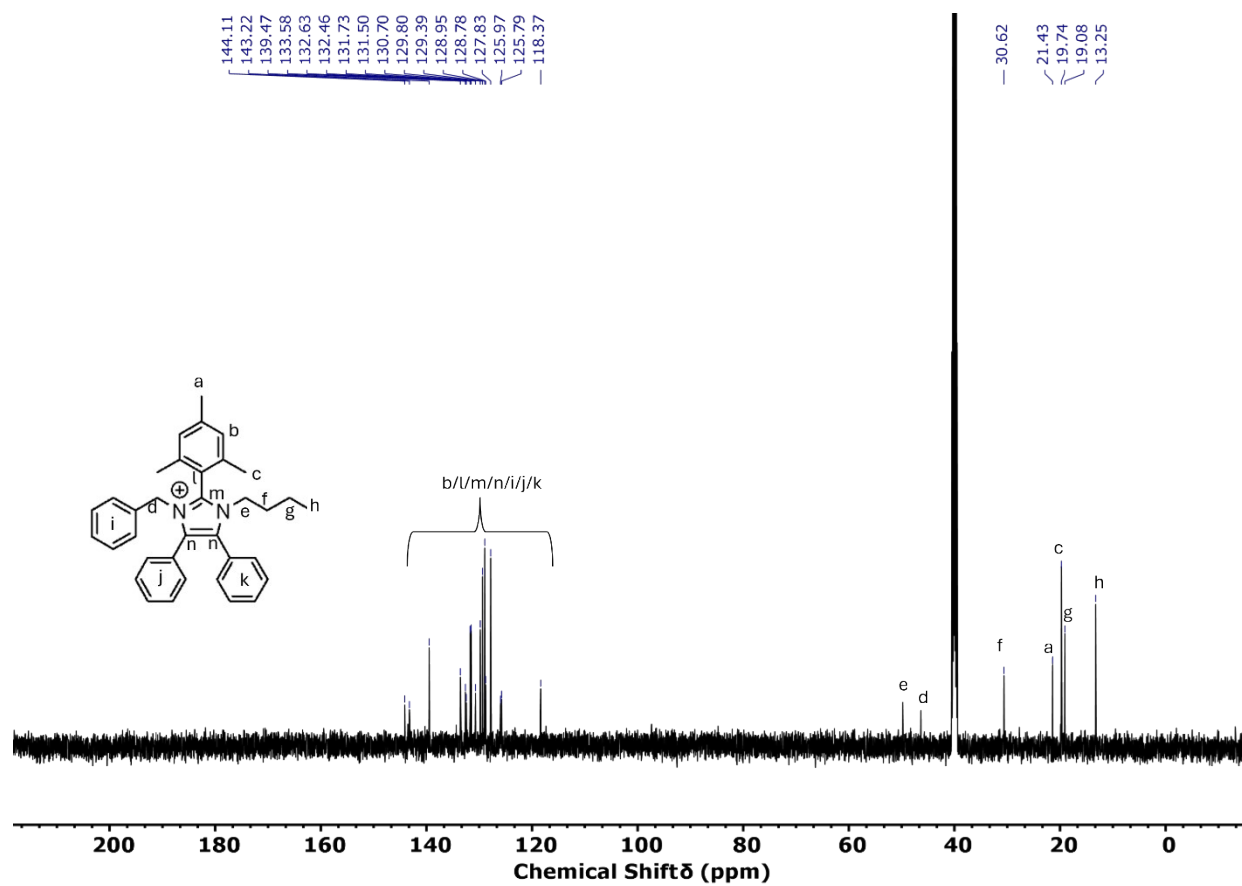

Figure S16:  $^{13}\text{C}$  NMR of compound 7c.

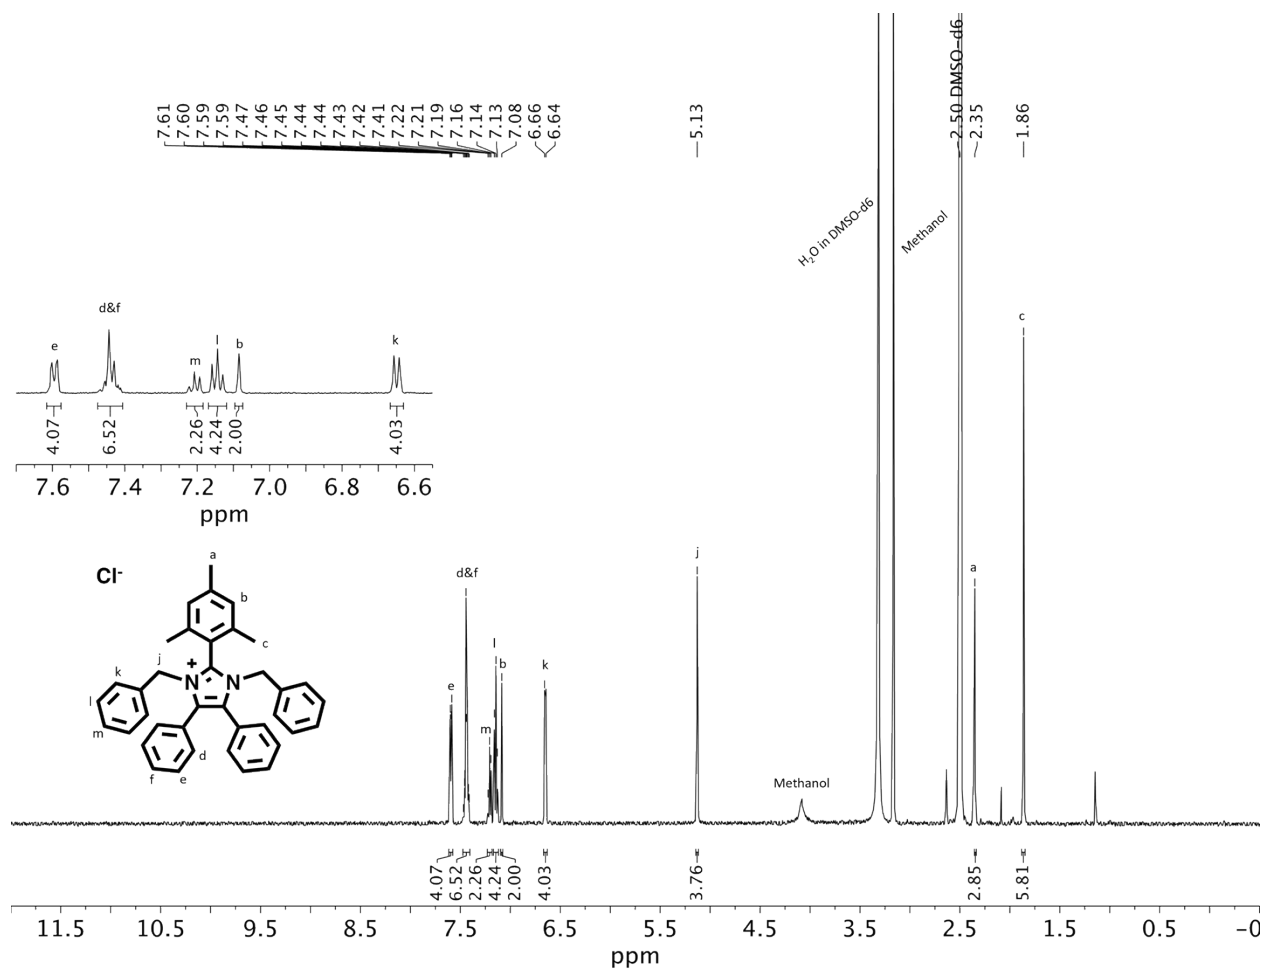

Figure S17: <sup>1</sup>H NMR of compound 7d.



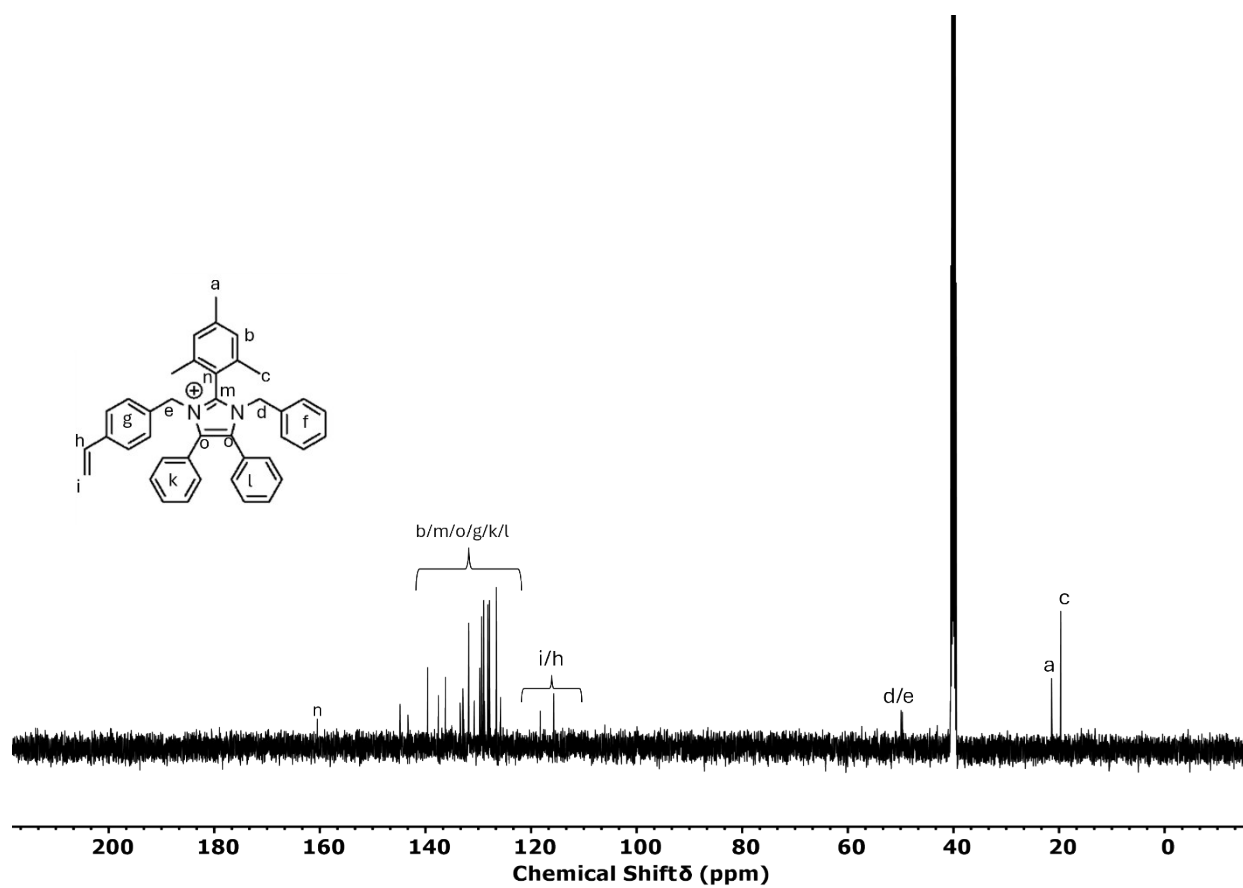

Figure S20:  $^{13}\text{C}$  NMR of compound 8d

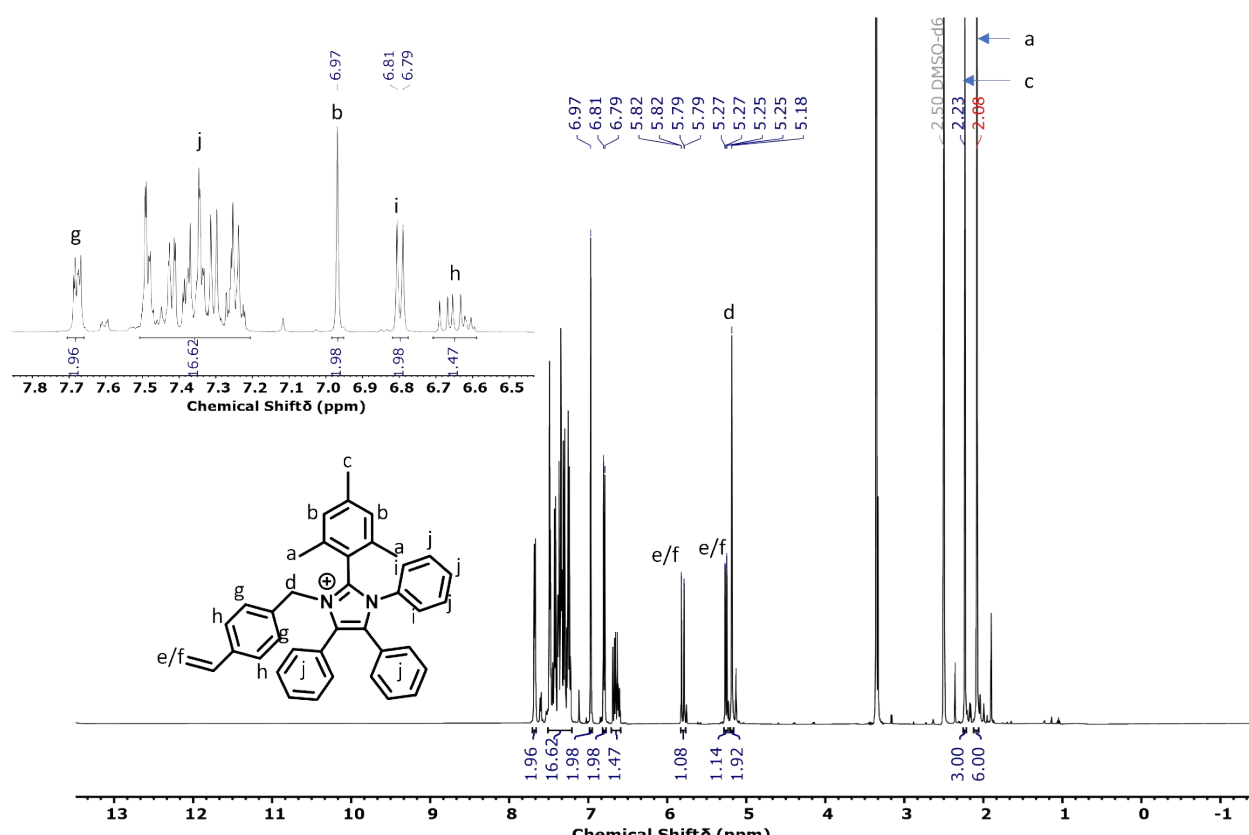

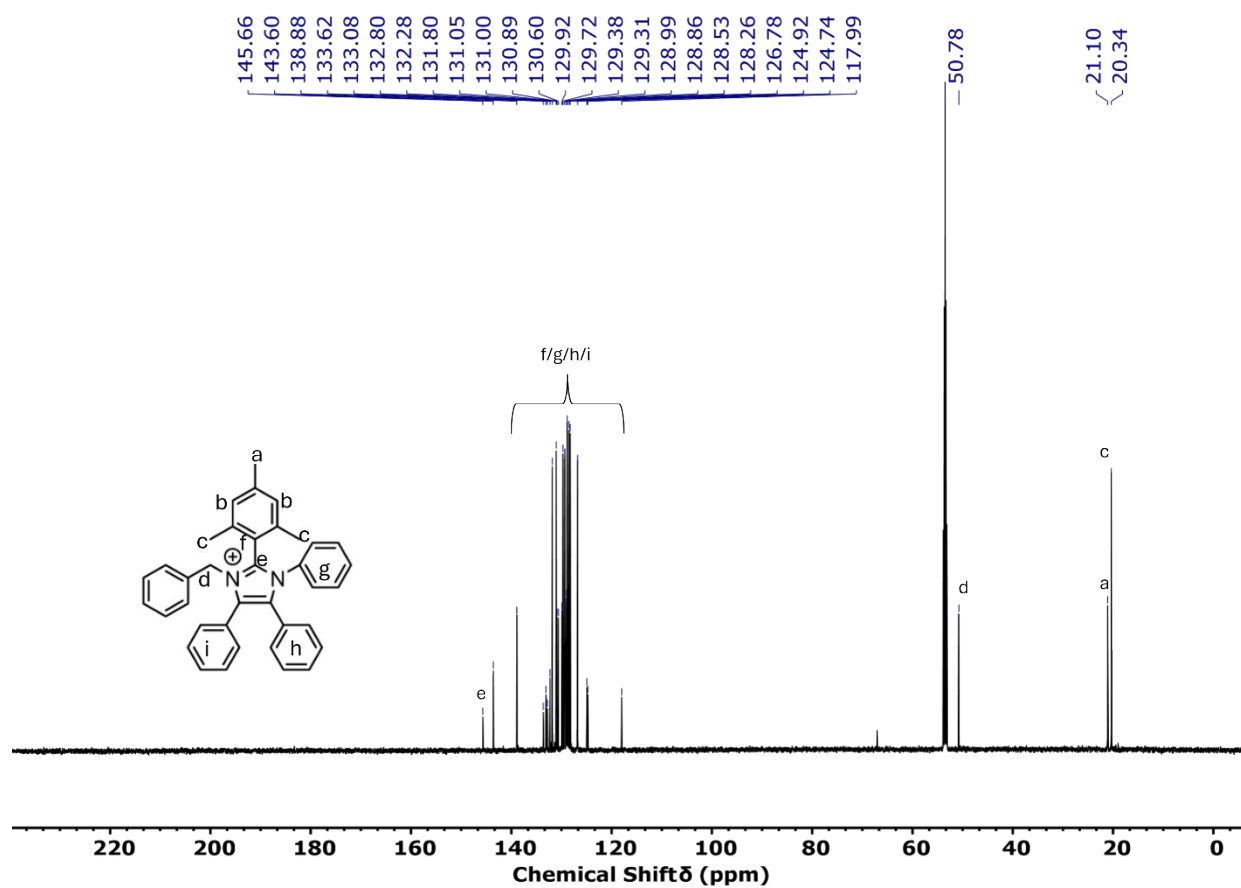

Figure S22:  $^{13}\text{C}$  NMR of compound 8a.

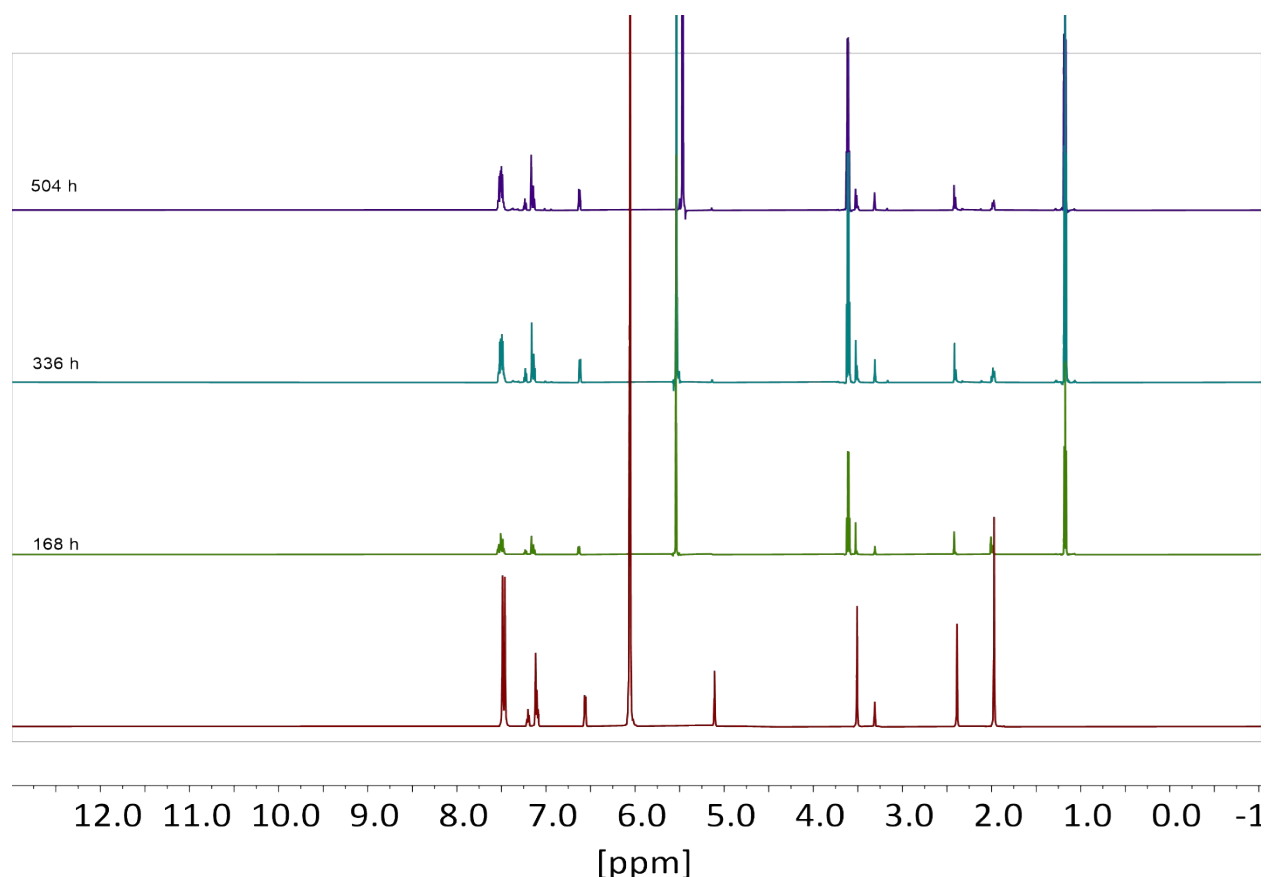

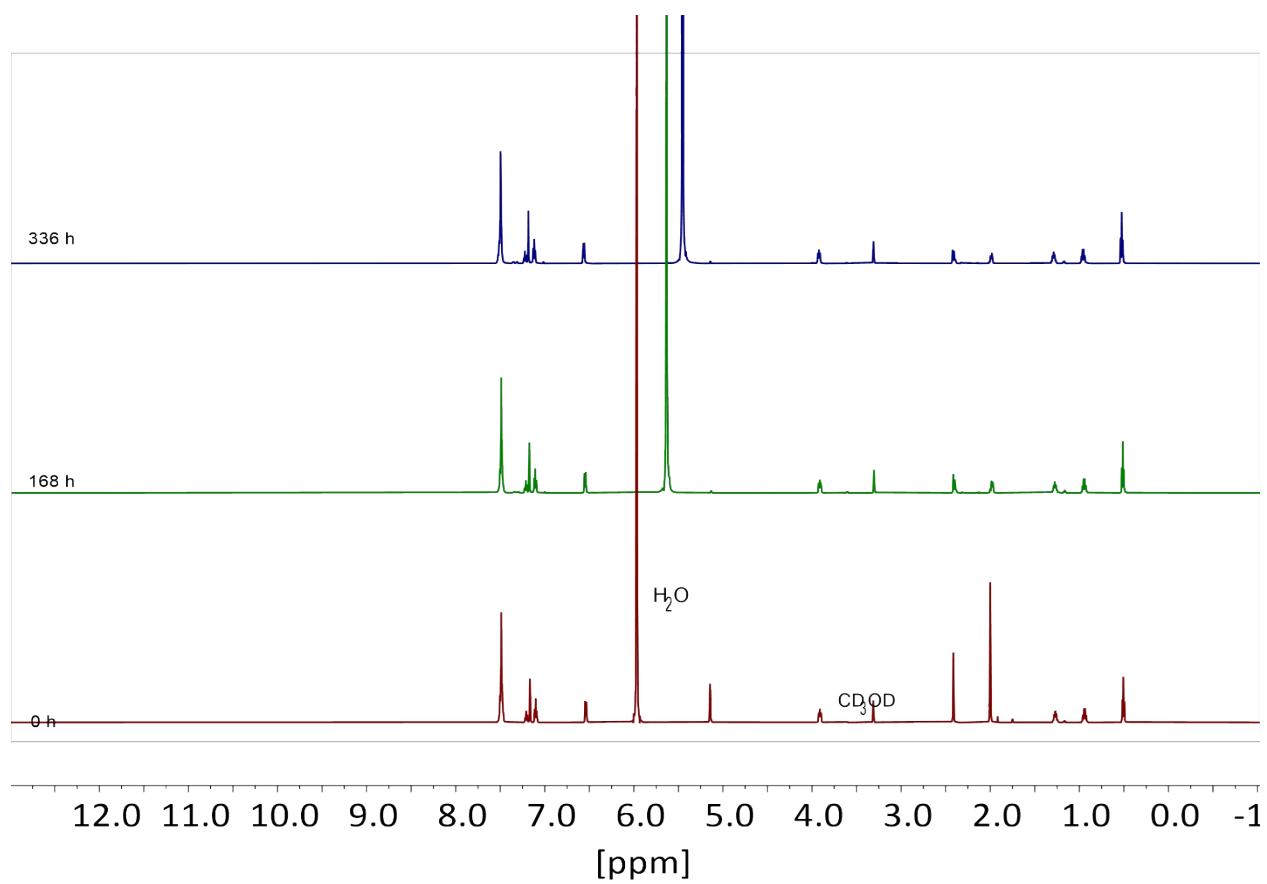

Figure S24: Degradation test of compound 7c.

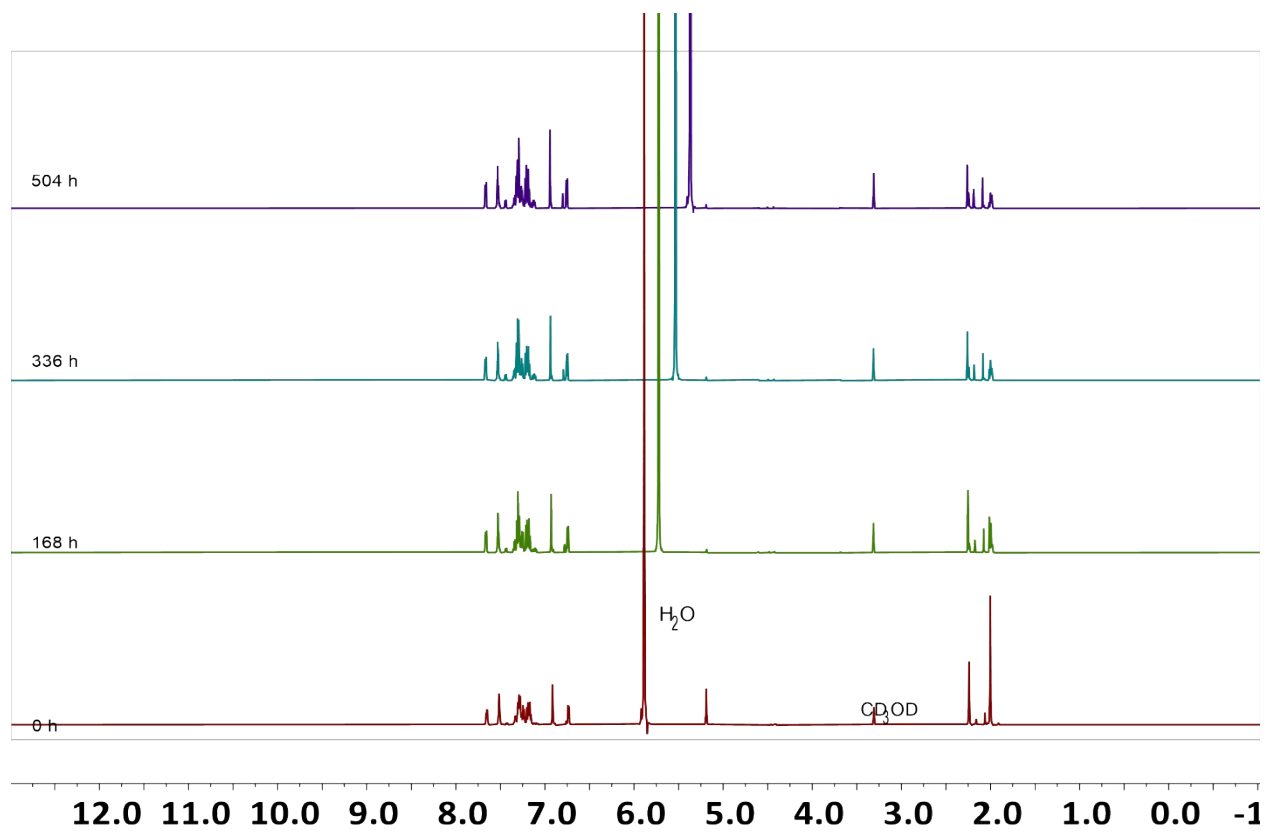

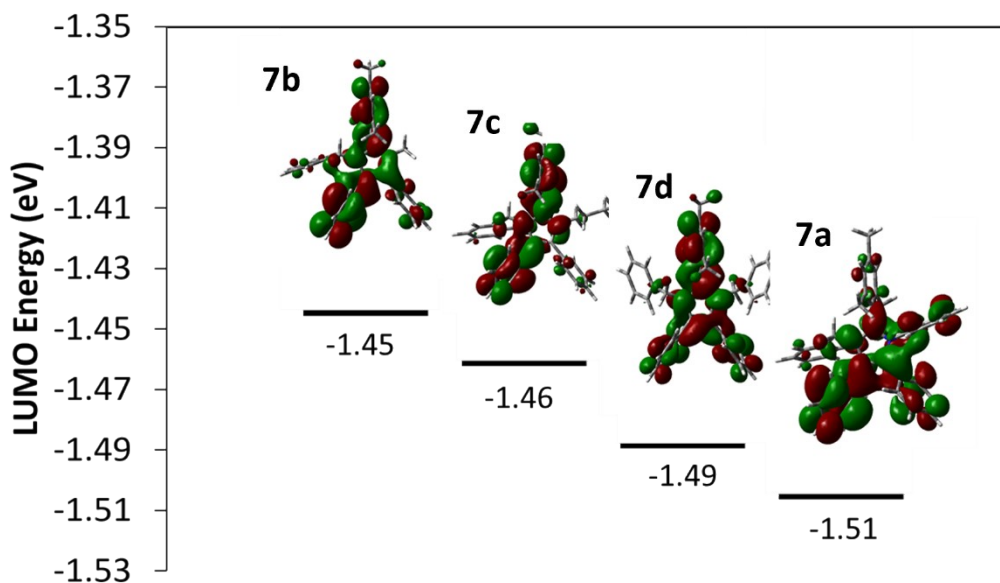

**Figure S26:** Lowest Unoccupied Molecular Orbital (LUMO) DFT calculated isosurfaces and energies.

**Table S1:** Cartesian coordinates in Å for Reagent 7a

| Atom | X        | Y        | Z        |
|------|----------|----------|----------|
| C    | -0.46192 | 1.38889  | -0.0494  |
| C    | -1.24652 | 0.31095  | -0.37995 |
| N    | -0.39976 | -0.7972  | -0.45321 |
| C    | 0.8695   | -0.419   | -0.19617 |
| C    | 2.07841  | -1.27132 | -0.27501 |
| C    | 2.70628  | -1.42833 | -1.53733 |
| C    | 2.59627  | -1.90223 | 0.87374  |
| C    | 3.85178  | -2.21736 | -1.61424 |
| C    | 3.75386  | -2.67944 | 0.74008  |
| C    | -2.70314 | 0.25658  | -0.6248  |
| C    | -3.59992 | 0.56332  | 0.40991  |
| C    | -3.20151 | -0.06643 | -1.8971  |
| C    | -4.97452 | 0.53721  | 0.17686  |
| H    | -3.21717 | 0.81355  | 1.39454  |
| C    | -4.5777  | -0.09638 | -2.12368 |
| H    | -2.51495 | -0.27686 | -2.71237 |
| C    | -5.46561 | 0.20401  | -1.08798 |
| H    | -5.66136 | 0.77342  | 0.98431  |
| H    | -4.95439 | -0.34598 | -3.11124 |
| H    | -6.53674 | 0.18214  | -1.26699 |
| C    | -0.84263 | 2.79779  | 0.16166  |



|   |          |          |          |
|---|----------|----------|----------|
| C | -1.59123 | 3.47049  | -0.81752 |
| C | -0.48892 | 3.47275  | 1.34162  |
| C | -1.97681 | 4.79587  | -0.61914 |
| C | -0.87404 | 4.79897  | 1.53282  |
| C | -1.61778 | 5.46321  | 0.55419  |
| H | -2.55265 | 5.3077   | -1.38463 |
| H | -0.59747 | 5.31088  | 2.44986  |
| C | 4.39463  | -2.85063 | -0.48688 |
| C | -0.80854 | -2.18097 | -0.78003 |
| H | -1.1933  | -2.18327 | -1.80184 |
| H | 0.11352  | -2.76712 | -0.77782 |
| H | 4.33845  | -2.3398  | -2.57891 |
| H | 4.15937  | -3.16349 | 1.62533  |
| H | -1.91694 | 6.49629  | 0.70619  |
| H | 0.07633  | 2.95825  | 2.11218  |
| H | -1.86259 | 2.95613  | -1.73391 |
| C | 2.171    | -0.75388 | -2.78003 |
| H | 1.11729  | -0.99446 | -2.96195 |
| H | 2.24613  | 0.33772  | -2.70961 |
| H | 2.7385   | -1.06663 | -3.66019 |
| C | 1.94498  | -1.80644 | 2.23498  |
| H | 1.22374  | -0.98852 | 2.30934  |
| H | 1.41215  | -2.73516 | 2.47296  |
| H | 2.69916  | -1.66053 | 3.01497  |
| C | 5.6379   | -3.69758 | -0.61009 |
| H | 5.96717  | -4.07011 | 0.36403  |
| H | 5.4607   | -4.56222 | -1.26133 |
| H | 6.46171  | -3.12648 | -1.054   |
| C | -1.83049 | -2.77948 | 0.16871  |
| C | -1.74873 | -2.61078 | 1.55621  |
| C | -2.8493  | -3.58057 | -0.36075 |
| C | -2.67212 | -3.23133 | 2.39887  |
| H | -0.97175 | -1.98672 | 1.98615  |
| C | -3.76694 | -4.21013 | 0.48228  |
| H | -2.92771 | -3.71203 | -1.43695 |
| C | -3.68206 | -4.03533 | 1.86483  |
| H | -2.59996 | -3.0868  | 3.47312  |
| H | -4.55232 | -4.82813 | 0.05641  |
| H | -4.39959 | -4.51874 | 2.52174  |
| C | 2.02819  | 1.73239  | 0.23532  |
| C | 2.75736  | 1.66192  | 1.42194  |
| C | 2.40387  | 2.59399  | -0.79761 |
| C | 3.89308  | 2.46018  | 1.56802  |
| H | 2.43872  | 1.00534  | 2.22323  |

|   |         |         |          |
|---|---------|---------|----------|
| C | 3.53807 | 3.39025 | -0.63792 |
| H | 1.81549 | 2.64413 | -1.70797 |
| C | 4.28413 | 3.32184 | 0.54119  |
| H | 4.46628 | 2.40922 | 2.48844  |
| H | 3.83671 | 4.06137 | -1.43712 |
| H | 5.16713 | 3.94229 | 0.6608   |
| N | 0.84932 | 0.91101 | 0.05716  |

**Table S2: Cartesian coordinates in Å for Reagent 7b**

| Atom | X        | Y        | Z        |
|------|----------|----------|----------|
| C    | -0.97047 | -1.45332 | -0.03213 |
| C    | -1.03895 | -0.14789 | 0.370278 |
| N    | 0.379296 | -1.76092 | -0.16959 |
| N    | 0.272556 | 0.314429 | 0.453891 |
| C    | 1.12048  | -0.68189 | 0.130849 |
| C    | 2.595753 | -0.63001 | 0.167682 |
| C    | 3.243328 | -0.71554 | 1.421484 |
| C    | 3.336466 | -0.52865 | -1.02069 |
| C    | 4.630894 | -0.6811  | 1.451874 |
| C    | 4.72991  | -0.49848 | -0.9326  |
| C    | -2.22834 | 0.668401 | 0.679993 |
| C    | -3.16615 | 0.944974 | -0.31926 |
| C    | -2.45074 | 1.141862 | 1.977112 |
| C    | -4.30397 | 1.687915 | -0.02635 |
| H    | -2.99943 | 0.583871 | -1.32407 |
| C    | -3.58739 | 1.888666 | 2.26529  |
| H    | -1.74713 | 0.911919 | 2.765216 |
| C    | -4.51519 | 2.163609 | 1.264664 |
| H    | -5.02194 | 1.897834 | -0.80682 |
| H    | -3.75113 | 2.247611 | 3.271716 |
| H    | -5.3994  | 2.74328  | 1.490556 |
| C    | -2.05467 | -2.42658 | -0.25606 |
| C    | -2.92334 | -2.7531  | 0.790301 |
| C    | -2.24041 | -3.0198  | -1.5094  |
| C    | -3.95908 | -3.65759 | 0.585321 |
| C    | -3.27483 | -3.92654 | -1.70925 |
| C    | -4.13569 | -4.24706 | -0.66309 |
| H    | -4.62382 | -3.90399 | 1.401408 |
| H    | -3.41174 | -4.37595 | -2.68278 |

|   |          |          |          |
|---|----------|----------|----------|
| C | 5.394233 | -0.56816 | 0.286188 |
| C | 0.686909 | 1.685633 | 0.802695 |
| H | 0.331386 | 1.903251 | 1.805896 |
| C | 0.918422 | -3.07982 | -0.51354 |
| H | 0.339695 | -3.84035 | -7.7E-05 |
| H | 1.952089 | -3.12679 | -0.19129 |
| H | 0.86408  | -3.24171 | -1.58646 |
| H | 1.77374  | 1.668738 | 0.838503 |
| H | 5.132658 | -0.75534 | 2.408252 |
| H | 5.305132 | -0.42085 | -1.84642 |
| H | -4.94077 | -4.95118 | -0.82075 |
| H | -1.58832 | -2.76171 | -2.33215 |
| H | -2.78267 | -2.30342 | 1.76284  |
| C | 2.467232 | -0.85494 | 2.708421 |
| H | 1.952064 | 0.070326 | 2.972436 |
| H | 1.712586 | -1.63952 | 2.647019 |
| H | 3.1369   | -1.0992  | 3.529706 |
| C | 2.697123 | -0.4313  | -2.3843  |
| H | 1.639343 | -0.68269 | -2.38035 |
| H | 2.794756 | 0.58133  | -2.77928 |
| H | 3.195696 | -1.09884 | -3.08619 |
| C | 6.898182 | -0.53    | 0.360308 |
| H | 7.344413 | -0.49871 | -0.63163 |
| H | 7.236979 | 0.348239 | 0.91259  |
| H | 7.285933 | -1.40587 | 0.882359 |
| C | 0.212332 | 2.754054 | -0.16096 |
| C | 0.242666 | 2.573222 | -1.54372 |
| C | -0.20181 | 3.983474 | 0.351965 |
| C | -0.13734 | 3.603214 | -2.39796 |
| H | 0.555151 | 1.628046 | -1.96397 |
| C | -0.57413 | 5.017704 | -0.50143 |
| H | -0.23634 | 4.134023 | 1.422931 |
| C | -0.54429 | 4.829663 | -1.87973 |
| H | -0.11338 | 3.447078 | -3.46763 |
| H | -0.8937  | 5.964511 | -0.08849 |
| H | -0.83891 | 5.629688 | -2.54463 |

**Table S3: Cartesian coordinates in Å for Reagent 7c.**

| Atom | X        | Y        | Z        |
|------|----------|----------|----------|
| C    | 0.532664 | 1.35322  | -0.16199 |
| C    | 1.176249 | 0.25768  | 0.342105 |
| N    | 0.223283 | -0.75318 | 0.447195 |
| C    | -0.973   | -0.28523 | 0.039539 |

|   |          |          |          |
|---|----------|----------|----------|
| C | -2.25486 | -1.02081 | 0.056121 |
| C | -2.92278 | -1.19594 | 1.286315 |
| C | -2.80848 | -1.51251 | -1.14137 |
| C | -4.14341 | -1.86407 | 1.288813 |
| C | -4.03464 | -2.17197 | -1.0816  |
| C | 2.591112 | 0.107839 | 0.732887 |
| C | 3.602406 | 0.256501 | -0.22069 |
| C | 2.938231 | -0.14391 | 2.064312 |
| C | 4.937641 | 0.149159 | 0.150922 |
| H | 3.341926 | 0.448642 | -1.25167 |
| C | 4.274487 | -0.25591 | 2.431485 |
| H | 2.167325 | -0.23239 | 2.817389 |
| C | 5.276317 | -0.11037 | 1.475939 |
| H | 5.711632 | 0.264168 | -0.595   |
| H | 4.531568 | -0.44764 | 3.463815 |
| H | 6.31518  | -0.19541 | 1.762983 |
| C | 1.076096 | 2.690886 | -0.47058 |
| C | 1.574666 | 3.495746 | 0.558237 |
| C | 1.126251 | 3.156451 | -1.78878 |
| C | 2.109837 | 4.747043 | 0.273094 |
| C | 1.657691 | 4.410117 | -2.06944 |
| C | 2.149382 | 5.207553 | -1.03972 |
| H | 2.491568 | 5.361642 | 1.076292 |
| H | 1.694437 | 4.758932 | -3.09194 |
| C | -4.71551 | -2.36229 | 0.118567 |
| C | 0.478584 | -2.13761 | 0.878552 |
| H | 0.868279 | -2.1113  | 1.892277 |
| H | -0.49289 | -2.62495 | 0.915243 |
| H | -4.66586 | -1.98829 | 2.228724 |
| H | -4.46861 | -2.54291 | -2.00122 |
| H | 2.563683 | 6.181522 | -1.26008 |
| H | 0.766499 | 2.533369 | -2.59592 |
| H | 1.538181 | 3.142714 | 1.5791   |
| C | -2.34947 | -0.69256 | 2.588769 |
| H | -1.58601 | -1.37191 | 2.973484 |
| H | -1.88764 | 0.288715 | 2.48948  |
| H | -3.1285  | -0.62173 | 3.344445 |
| C | -2.11215 | -1.38521 | -2.47451 |
| H | -1.52739 | -0.47231 | -2.56652 |
| H | -1.43252 | -2.22473 | -2.63219 |
| H | -2.83817 | -1.40028 | -3.28489 |
| C | -6.0282  | -3.09995 | 0.156365 |
| H | -6.53733 | -3.05323 | -0.8048  |
| H | -5.86891 | -4.15424 | 0.393783 |

|   |          |          |          |
|---|----------|----------|----------|
| H | -6.68938 | -2.69183 | 0.919817 |
| C | 1.417018 | -2.91978 | -0.01882 |
| C | 1.455171 | -2.74262 | -1.4009  |
| C | 2.222326 | -3.90119 | 0.560596 |
| C | 2.28363  | -3.53411 | -2.19085 |
| H | 0.848354 | -1.98198 | -1.87062 |
| C | 3.044794 | -4.69873 | -0.22852 |
| H | 2.208698 | -4.04233 | 1.633432 |
| C | 3.078187 | -4.51685 | -1.60807 |
| H | 2.306222 | -3.38155 | -3.26106 |
| H | 3.663524 | -5.45435 | 0.23548  |
| H | 3.721341 | -5.13136 | -2.22257 |
| C | -1.88479 | 1.903401 | -0.76104 |
| H | -1.50367 | 2.495853 | -1.5878  |
| H | -2.68958 | 1.282389 | -1.14199 |
| N | -0.80117 | 0.99385  | -0.3374  |
| C | -2.38741 | 2.803676 | 0.366866 |
| H | -2.75896 | 2.185089 | 1.185873 |
| H | -1.55828 | 3.393021 | 0.761741 |
| C | -3.49986 | 3.736204 | -0.12025 |
| H | -3.12479 | 4.344909 | -0.94679 |
| H | -4.32079 | 3.138785 | -0.52472 |
| C | -4.02799 | 4.647979 | 0.988027 |
| H | -3.23455 | 5.282429 | 1.386514 |
| H | -4.82006 | 5.298365 | 0.616495 |
| H | -4.4355  | 4.065001 | 1.815722 |

**Table S4: Cartesian coordinates in Å for Reagent 7d.**

| Atom | X        | Y        | Z        |
|------|----------|----------|----------|
| C    | 0.519417 | 1.530799 | 0.348801 |
| C    | -0.66204 | 1.47603  | -0.34095 |
| N    | -0.94891 | 0.124917 | -0.53946 |
| C    | 0.031004 | -0.62565 | -0.00231 |
| C    | 0.101489 | -2.10008 | -0.00568 |
| C    | 0.518238 | -2.77248 | -1.17155 |
| C    | -0.25389 | -2.8138  | 1.154957 |
| C    | 0.566192 | -4.16307 | -1.1497  |
| C    | -0.17848 | -4.20382 | 1.124115 |
| C    | -1.51015 | 2.58749  | -0.81324 |
| C    | -2.07151 | 3.480333 | 0.104614 |
| C    | -1.73424 | 2.786106 | -2.18044 |
| C    | -2.85043 | 4.543574 | -0.33632 |
| H    | -1.89618 | 3.342413 | 1.16236  |

|   |          |          |          |
|---|----------|----------|----------|
| C | -2.51767 | 3.847296 | -2.61745 |
| H | -1.27934 | 2.12367  | -2.90496 |
| C | -3.07873 | 4.726316 | -1.69619 |
| H | -3.27959 | 5.227263 | 0.382484 |
| H | -2.68159 | 3.992582 | -3.67587 |
| H | -3.68646 | 5.552425 | -2.03729 |
| C | 1.257063 | 2.715632 | 0.828103 |
| C | 1.729527 | 3.66409  | -0.08401 |
| C | 1.461777 | 2.926194 | 2.196564 |
| C | 2.402915 | 4.794439 | 0.363749 |
| C | 2.139839 | 4.054962 | 2.640376 |
| C | 2.613348 | 4.989641 | 1.724766 |
| H | 2.763992 | 5.520762 | -0.35065 |
| H | 2.289593 | 4.208624 | 3.699719 |
| C | 0.227623 | -4.89854 | -0.01404 |
| C | -2.18929 | -0.42214 | -1.14511 |
| H | -2.58546 | 0.365687 | -1.77838 |
| H | -1.89835 | -1.24972 | -1.78486 |
| H | 0.883381 | -4.68599 | -2.04275 |
| H | -0.4566  | -4.75872 | 2.010718 |
| H | 3.139064 | 5.868147 | 2.071158 |
| H | 1.072994 | 2.218545 | 2.916825 |
| H | 1.567653 | 3.51669  | -1.14262 |
| C | 0.93519  | -2.02906 | -2.4173  |
| H | 0.142686 | -1.3866  | -2.80477 |
| H | 1.803278 | -1.39601 | -2.22891 |
| H | 1.201157 | -2.7274  | -3.20711 |
| C | -0.74078 | -2.11921 | 2.403512 |
| H | -1.66168 | -1.56554 | 2.216048 |
| H | -0.94511 | -2.84385 | 3.187962 |
| H | -0.01026 | -1.41083 | 2.797903 |
| C | 0.320523 | -6.40147 | -0.01275 |
| H | -0.33629 | -6.84116 | 0.735719 |
| H | 0.059626 | -6.81662 | -0.98528 |
| H | 1.339019 | -6.72365 | 0.215112 |
| C | -3.22838 | -0.88081 | -0.14477 |
| C | -3.61872 | -2.21908 | -0.12132 |
| C | -3.84613 | 0.022666 | 0.723473 |
| C | -4.60542 | -2.65251 | 0.759159 |
| H | -3.15157 | -2.92743 | -0.79274 |
| C | -4.82528 | -0.41144 | 1.608895 |
| H | -3.57577 | 1.069594 | 0.701438 |
| C | -5.20679 | -1.75039 | 1.628874 |
| H | -4.90272 | -3.6918  | 0.763324 |

|   |          |          |          |
|---|----------|----------|----------|
| H | -5.2999  | 0.296532 | 2.27393  |
| H | -5.97398 | -2.08489 | 2.312983 |
| C | 2.222033 | -0.21693 | 1.141572 |
| H | 2.012246 | -1.07228 | 1.776567 |
| C | 3.299228 | -0.56802 | 0.137967 |
| C | 3.825184 | 0.395167 | -0.72651 |
| C | 3.817441 | -1.86201 | 0.107521 |
| C | 4.840425 | 0.062245 | -1.61511 |
| H | 3.454721 | 1.410858 | -0.69905 |
| C | 4.840172 | -2.19357 | -0.7761  |
| C | 5.349899 | -1.2333  | -1.64208 |
| H | 5.243138 | 0.81605  | -2.27719 |
| H | 5.236933 | -3.19907 | -0.78567 |
| H | 6.144798 | -1.48862 | -2.32867 |
| H | 3.422277 | -2.61533 | 0.77621  |
| H | 2.541548 | 0.601533 | 1.779287 |
| N | 0.934579 | 0.212281 | 0.53944  |
